# Supplementary material for: A Novel Flavonoid Glucoside from the Fruits of Lycium ruthenicun
Source: MDPI journal article supplement (doi:10.3390/molecules23020325), 2018-02-03
Supplement: s1 [file s1]

**Supplementary Materials: A novel flavonoid glucoside from the  
fruits of *Lycium ruthenicum***

Jing-Jing Qi, Yong-Ming Yan, Li-Zhi Cheng, Bao-Hua Liu, Fu-Ying Qin, Yong-Xian  
Cheng

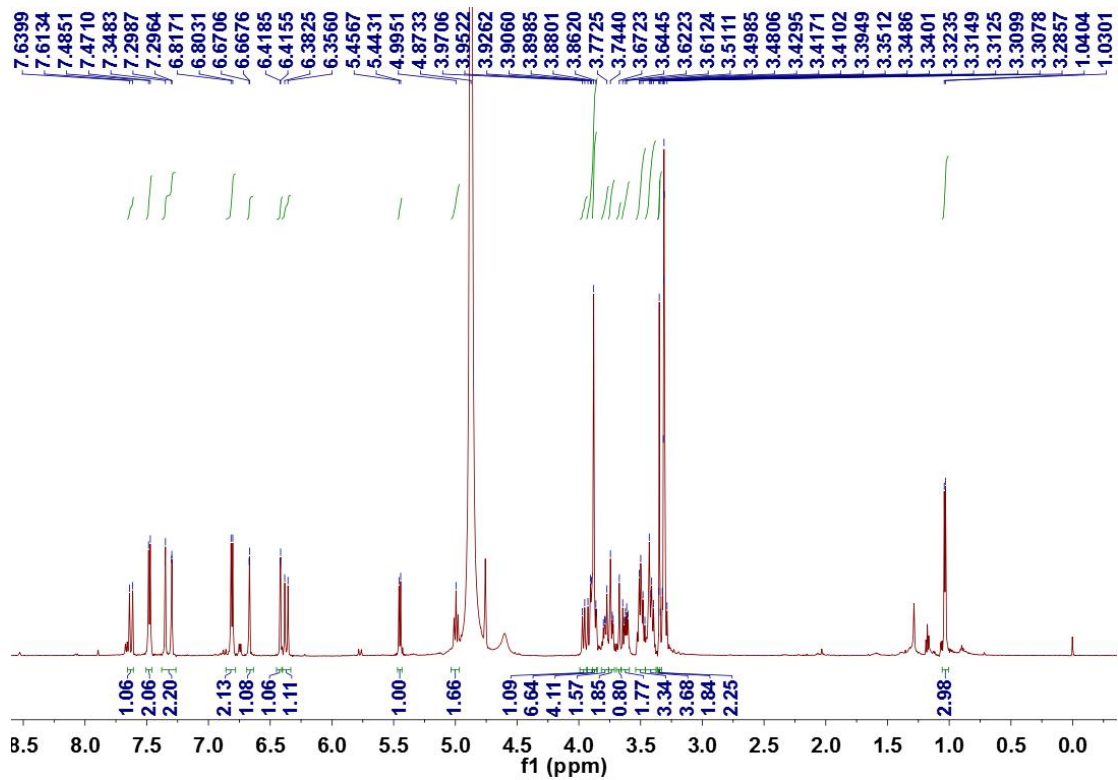

Figure S1. <sup>1</sup>H NMR spectrum of **1** in methanol-*d*<sub>4</sub>

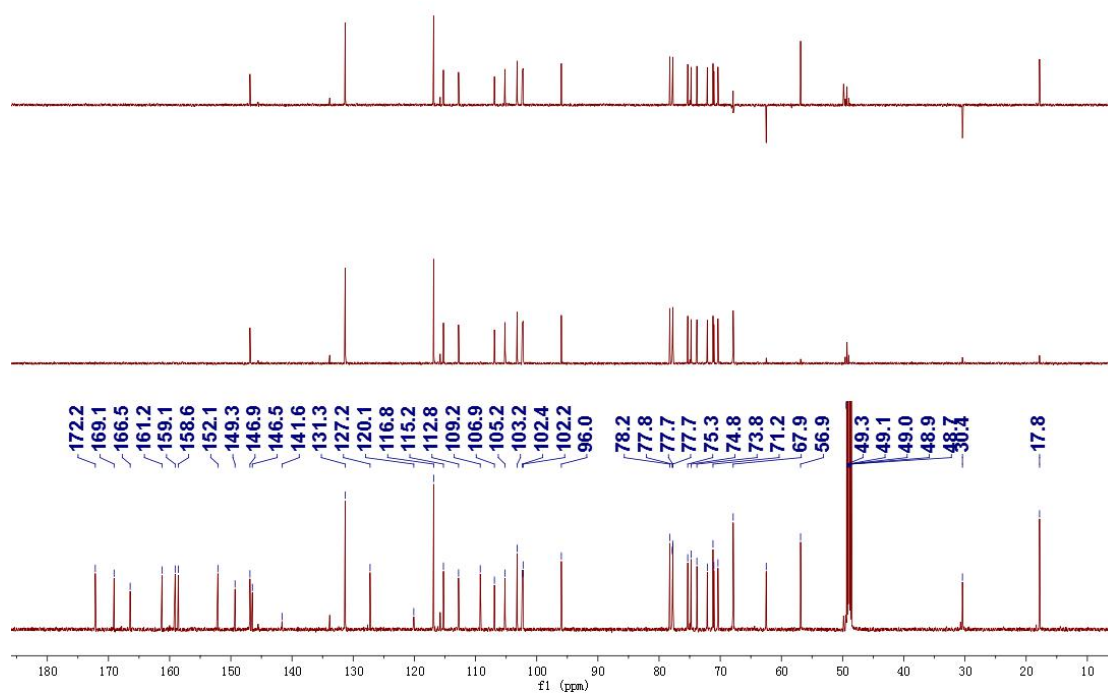

Figure S2.  $^{13}\text{C}$  NMR and DEPT spectra of **1** in methanol- $d_4$

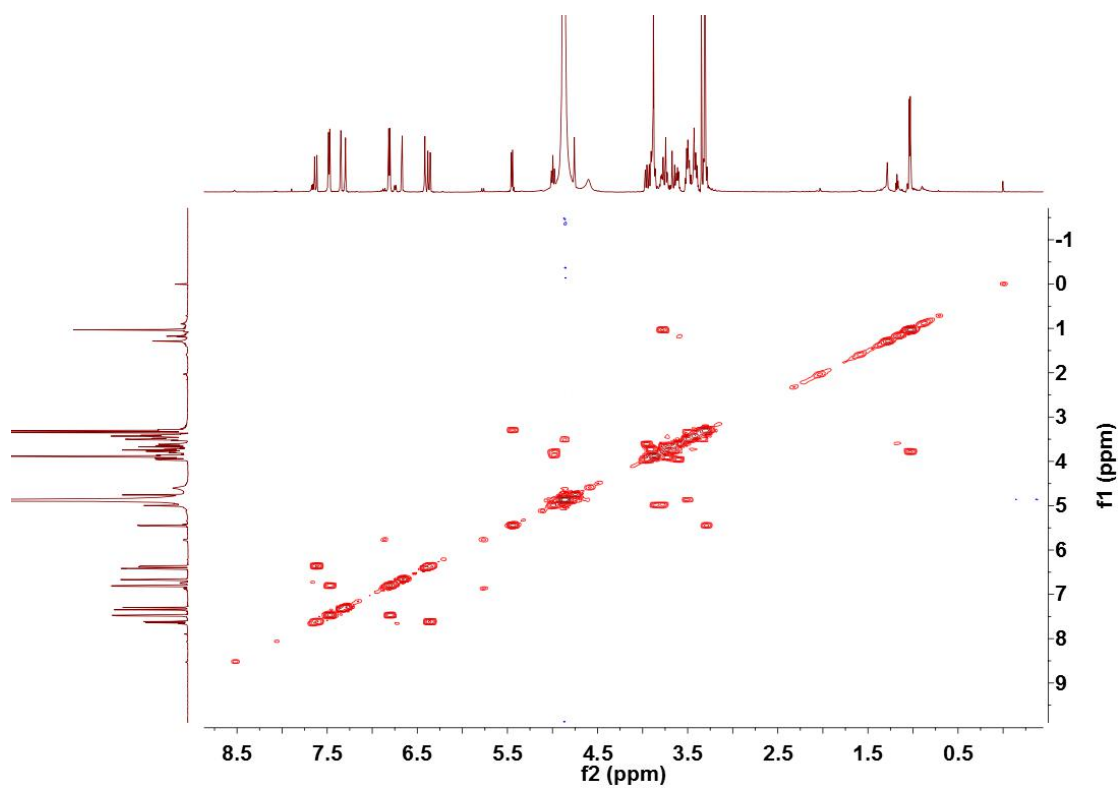

Figure S3.  $^1\text{H}$ - $^1\text{H}$  COSY spectrum of **1** in methanol- $d_4$

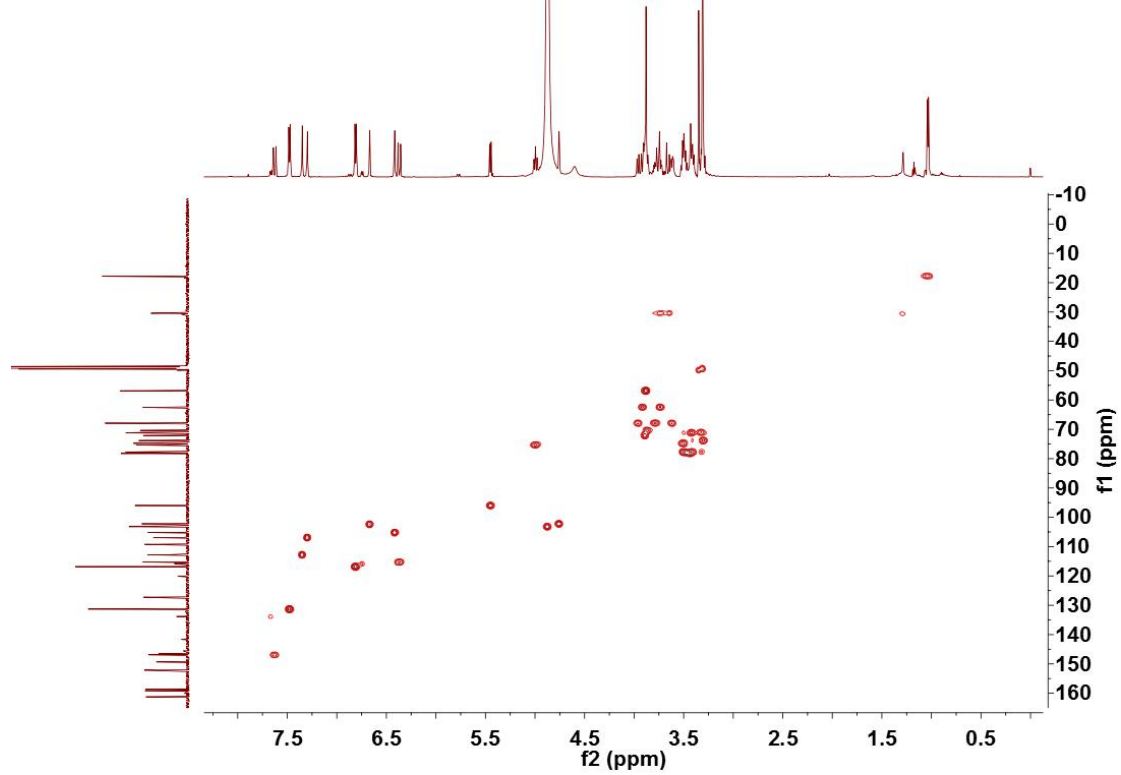

Figure S4. HSQC spectrum of **1** in methanol-*d*<sub>4</sub>

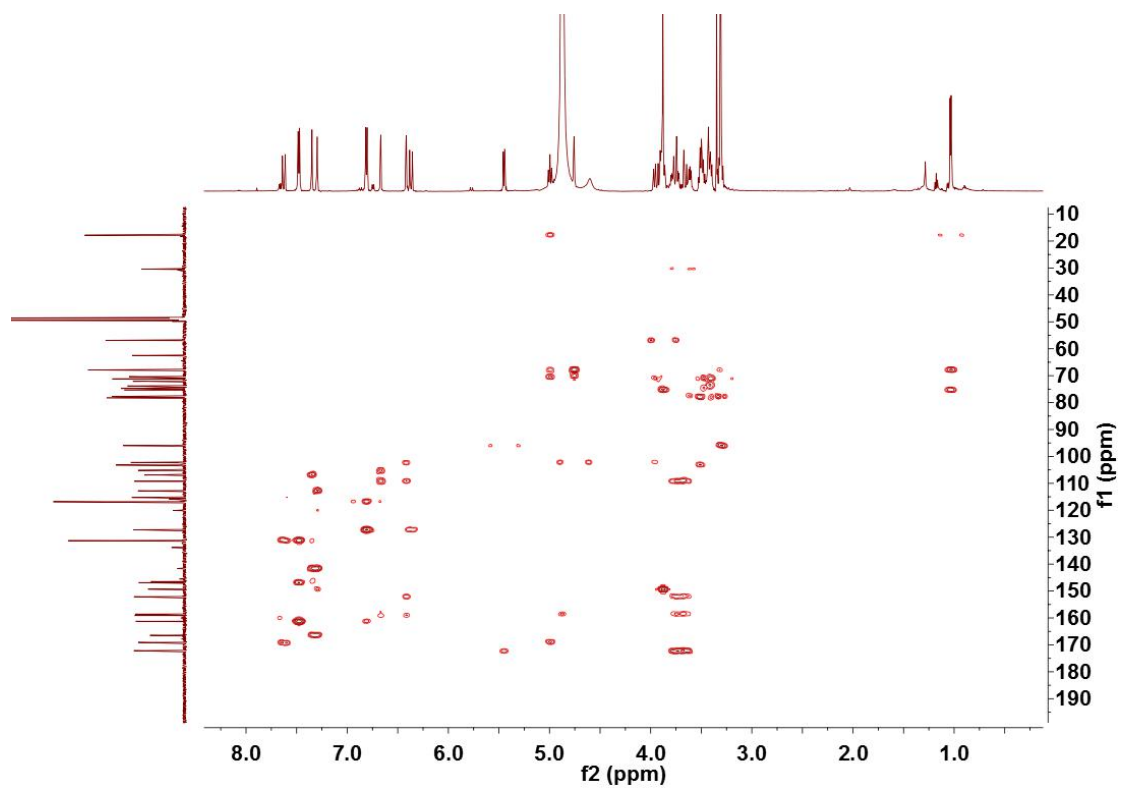

Figure S5. HMBC spectrum of **1** in methanol-*d*<sub>4</sub>

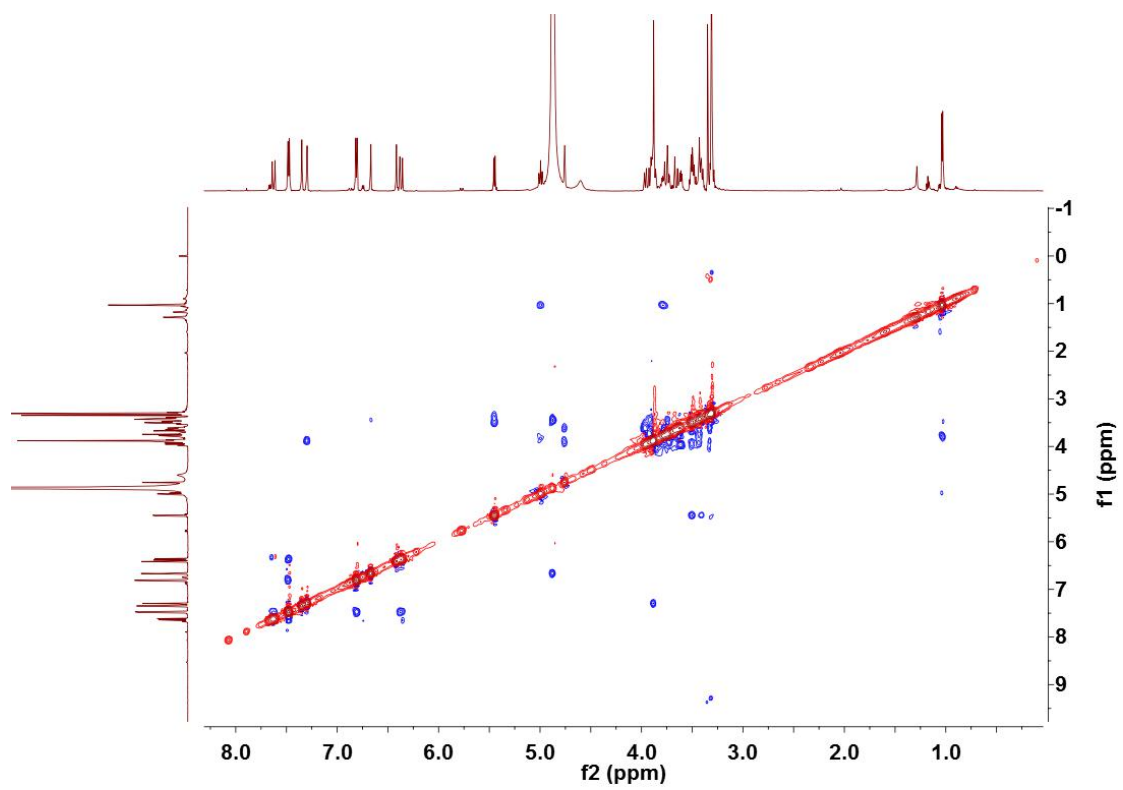

Figure S6. ROESY spectrum of **1** in methanol-*d*<sub>4</sub>

## Qualitative Analysis Report

|                        |                      |               |                       |
|------------------------|----------------------|---------------|-----------------------|
| Data Filename          | 180119ESIA6.d        | Sample Name   | Qg-6a                 |
| Sample Type            | Sample               | Position      |                       |
| Instrument Name        | Agilent G6230 TOF MS | User Name     | KIB                   |
| Acq Method             | ESI.m                | Acquired Time | 1/19/2018 10:53:59 AM |
| IRM Calibration Status | Success              | DA Method     | ESI.m                 |
| Comment                |                      |               |                       |

|                       |                             |
|-----------------------|-----------------------------|
| <b>Sample Group</b>   | <b>Info.</b>                |
| <b>Acquisition SW</b> | 6200 series TOF/6500 series |
| <b>Version</b>        | Q-TOF B.05.01 (B5125.2)     |

### User Spectra

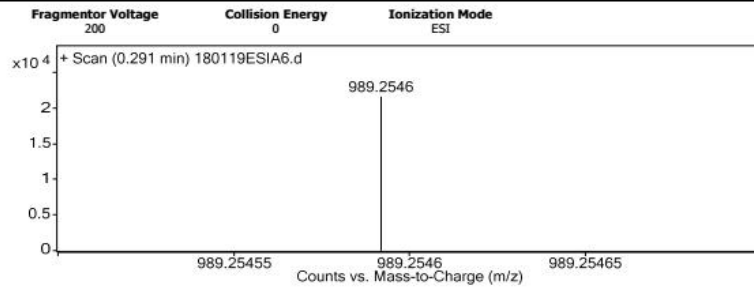

### Peak List

| m/z      | z | Abund    | Formula        | Ion |
|----------|---|----------|----------------|-----|
| 119.0611 | 1 | 5677.25  |                |     |
| 123.0922 | 1 | 14247.06 |                |     |
| 212.119  | 1 | 68231    |                |     |
| 213.1217 | 1 | 8095.68  |                |     |
| 368.4261 | 1 | 8469.51  |                |     |
| 437.2303 | 1 | 8291.43  |                |     |
| 495.1488 | 1 | 11115.65 |                |     |
| 549.1225 | 1 | 6741     |                |     |
| 989.2546 | 1 | 21570.55 | C43 H50 Na O25 | M+  |
| 990.2571 | 1 | 8602.18  | C43 H50 Na O25 | M+  |

### Formula Calculator Element Limits

| Element | Min | Max |
|---------|-----|-----|
| C       | 0   | 200 |
| H       | 0   | 400 |
| O       | 21  | 29  |
| Na      | 1   | 1   |

### Formula Calculator Results

| Formula        | CalculatedMass | Mz       | Diff. (mDa) | Diff. (ppm) | DBE  |
|----------------|----------------|----------|-------------|-------------|------|
| C43 H50 Na O25 | 989.2539       | 989.2546 | -0.7        | 0.7         | 18.5 |

--- End Of Report ---

Figure S7. HRESIMS spectrum of 1

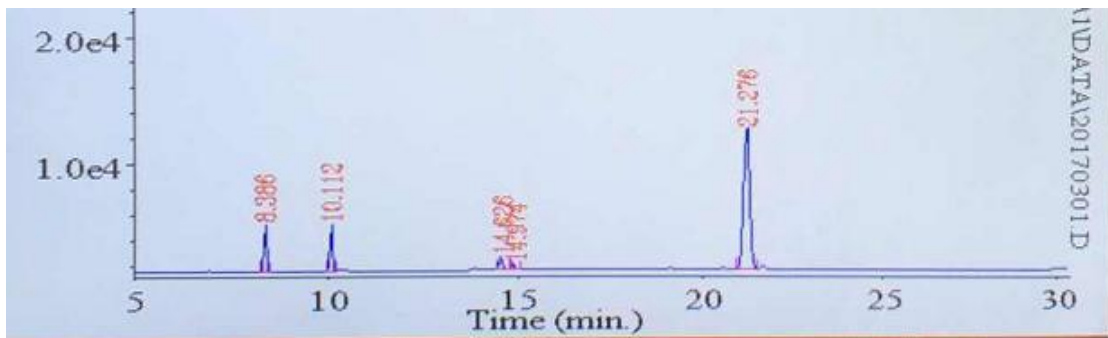

Figure S8. GC analysis of the derivative of D-glucose

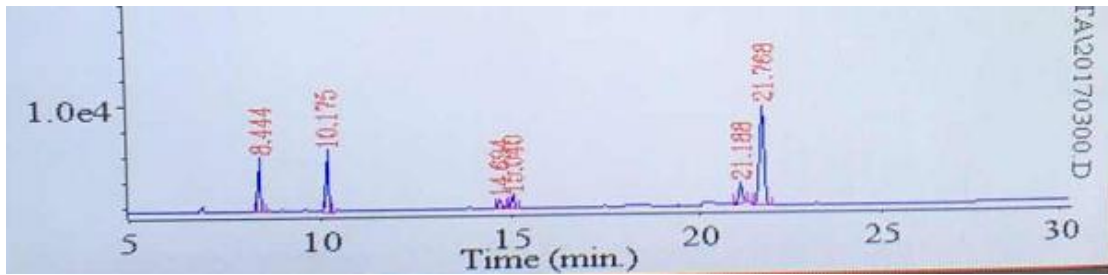

Figure S9. GC analysis of the derivative of L-glucose

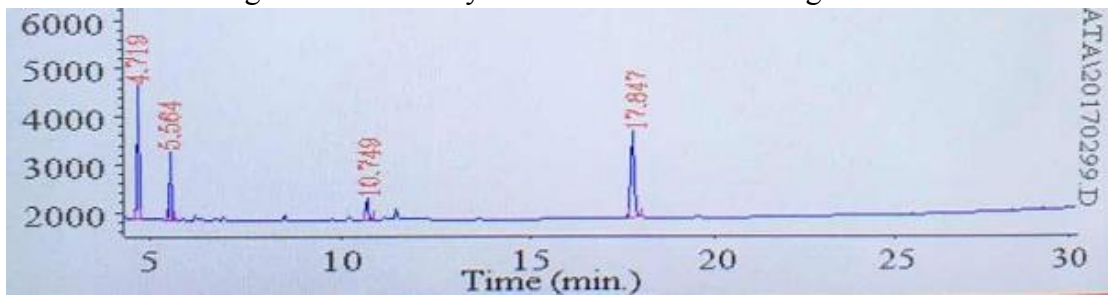

Figure S10. GC analysis of the derivative of L-rhamnose

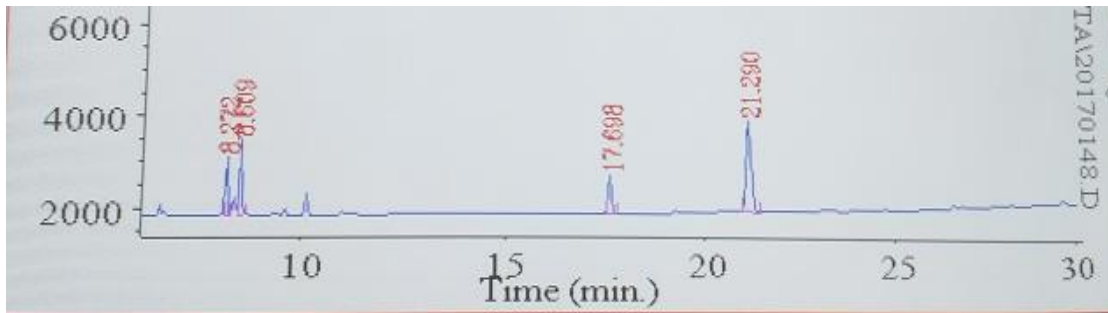

Figure S11. GC analysis of the derivative of compound 1 after hydrolysis

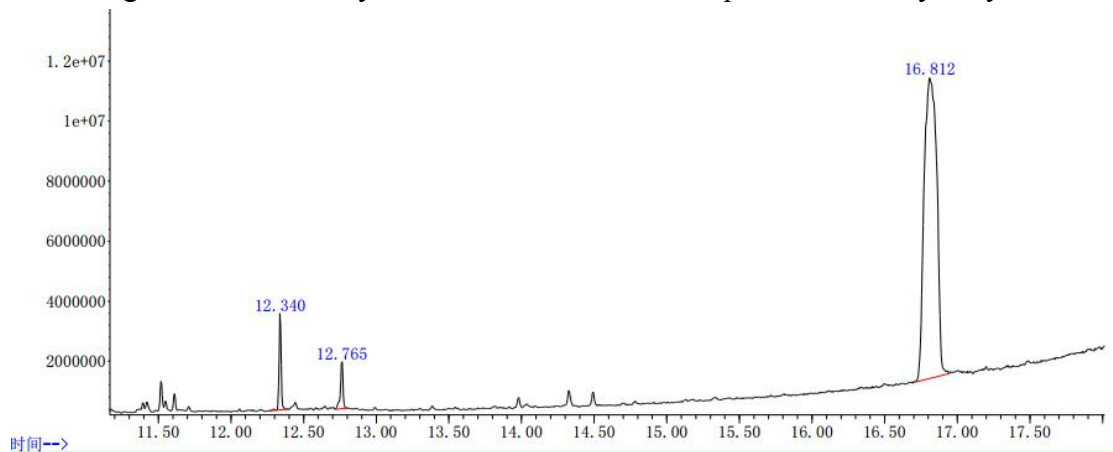

Figure S12. GC/MS analysis of the derivative of L-rhamnose

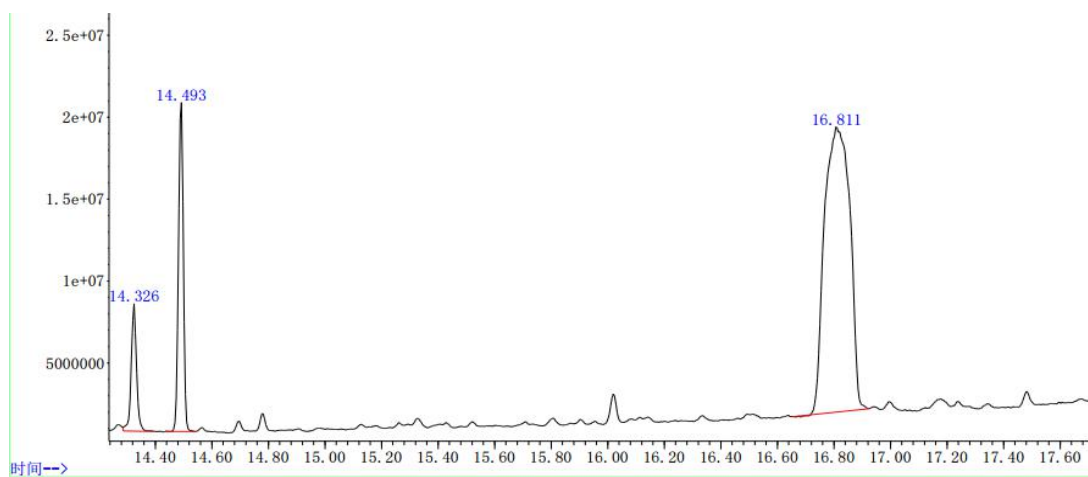

Figure S13. GC/MS analysis of the derivative of compound **1** after hydrolysis

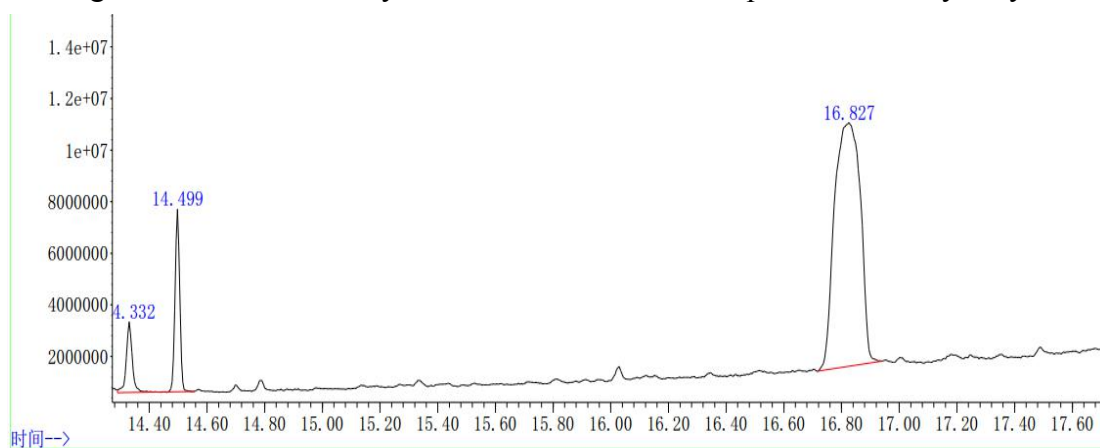

Figure S14. GC/MS analysis of the mixture of L-rhamnose with **1** after hydrolysis
